# Supplementary material for: Amphibious superamphiphilic fabrics with self-healing underwater superoleophilicity
Source: Royal Society of Chemistry journal article supplement (doi:10.1039/c8mh00898a), 2018-09-27
Supplement: c8mh00898a1.pdf [file c8mh00898a1.pdf]

## Amphibious Superamphiphilic Fabrics with Self-healing Underwater Superoleophilicity

Sida Fu<sup>†a</sup>, Hua Zhou<sup>†a</sup>, Hongxia Wang<sup>a\*</sup>, Haitao Niu<sup>a</sup>, Weidong Yang<sup>b</sup>, Hao Shao<sup>a</sup>, Tong Lin<sup>a\*</sup>

a Institute for Frontier Materials, Deakin University, Geelong, VIC 3216, Australia.

b Future Manufacturing Flagship, CSIRO, Clayton South, VIC 3169, Australia.

<sup>†</sup>Authors who equally contribute to the paper.

Corresponding authors' emails: [hong.wang@deakin.edu.au](mailto:hong.wang@deakin.edu.au); [tong.lin@deakin.edu.au](mailto:tong.lin@deakin.edu.au)

## Electronic Supplementary Information

## Experimental Section

*Materials:* Glycerol propoxylate triglycidyl ether (GPTE, molecular weight 434, epoxy value 0.69) was supplied by Alfa Chemistry and used as received. Octadecylamine (ODA), 1-methylimidazole, ethanol, acid yellow, oil red and oil blue were provided by Sigma-Aldrich. Commercial polyester fabric (plain weave,  $168 \text{ g} \cdot \text{m}^{-2}$ , thickness  $\approx 420 \text{ }\mu\text{m}$ ) was purchased from a local textile shop, and it was cleaned with acetone and distilled water prior to use.

*Preparation of Coating Solution:* 5 g GPTE and a drop of 1-methylimidazole were added to 50 ml ethanol and then stirred for 30 min. 1 g ODA was added to the as-prepared solution and stirred overnight. The slight turbid solution further stirred for 15 min at  $50 \text{ }^\circ\text{C}$ . After that, a transparent solution was prepared for coating.

*Coating treatment:* Polyester fabric was immersed into the coating solution for 1 min, and dried at room temperature for 5 min and finally cured at  $150 \text{ }^\circ\text{C}$  for 1 hour. After heating, the fabric was rinsed with ethanol, and then heated at  $150 \text{ }^\circ\text{C}$  for 10 min.

*Self-healing test:* Two methods, UV-irradiation and air plasma treatment, were employed to deliberately damage the coating on the fabrics. For UV-irradiation, a UV lamp (Spectroline, model EPS-100/F, wavelength mainly at 254 nm, intensity  $38 \text{ mW}/\text{cm}^2$ ) was used to irradiate the superamphiphilic fabric on one fabric side. For each UV-irradiation treatment, 10 hours of irradiation was employed, and the irradiated fabric was heated at  $150 \text{ }^\circ\text{C}$  for 30 min. For air plasma treatment, the coated fabrics were subjected to a vacuum plasma treatment using a purpose made plasma machine consisting of a vacuum chamber, a radio-frequent plasma generator (T & C Power Conversion, Inc. AG0201HV), an electrode system, and a gas supplying system. For each plasma treatment, 5 min of plasma treatment under a power of 28 W was used, and plasma treated fabric was then heated at  $150 \text{ }^\circ\text{C}$  for 30 min.

*Characterizations:* SEM images were taken using an SEM Supra 55VP operated at an acceleration voltage of 5.0 kV. The contact angle was measured using a Contact Angle Meter (KSV Model CAM 101) with liquid droplets about  $5 \text{ }\mu\text{L}$  in volume. All the CA values were the average of 6 measurements. The spreading time was measured using a Contact Angle Meter (interval time is 0.033 s) or a stopwatch. FTIR spectra were measured using a Burker Vetex 70 instrument in Attenuated Total Reflection mode. The spectra were obtained under 64 scans at  $4 \text{ cm}^{-1}$  resolution. The XPS spectra were recorded using a VG ESCALAB 220-iXL XPS spectrometer with a monochromated AL  $K\alpha$  source (1486.6 eV) using samples of  $\sim 3 \text{ mm}^2$  in size. The collected XPS results were analyzed by the CasaXPS software.  $^1\text{H-NMR}$  was performed on Bruker BioSpin Av400H NMR spectrometer using  $\text{CDCl}_3$  as solvent. GPTE-ODA were dried under vacuum before NMR experiments. GPC was performed using tetrahydrofuran (THF) as the eluent. The GPC system was a Shimadzu modular system comprising an auto injector, two MIX C columns provided by Polymer Lab, and a differential refractive-index detector and a UV detector. The system was calibrated with narrow molecular weight distribution polystyrene standards with molecular weights of 200 to  $106 \text{ g mol}^{-1}$ . AFM was conducted with a Cypher AFM (Asylum Research) using the tapping model.

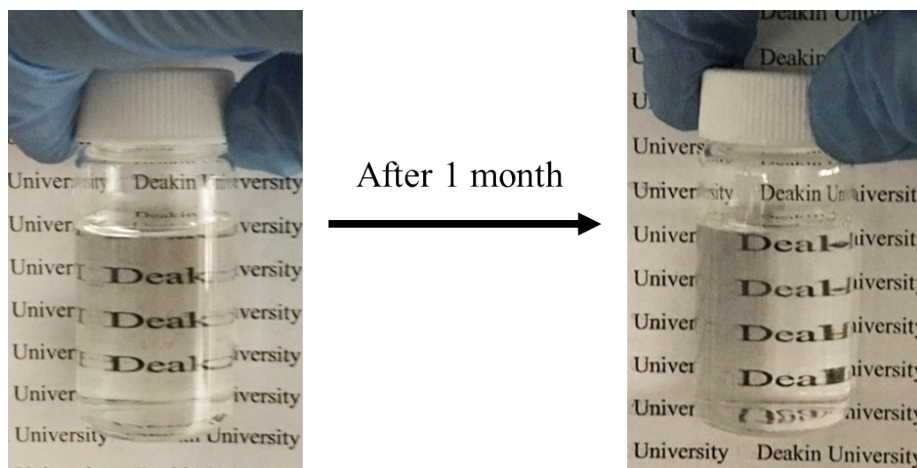

**Fig. S1** Photos to show the coating solution before and after one-month storage at room temperature.

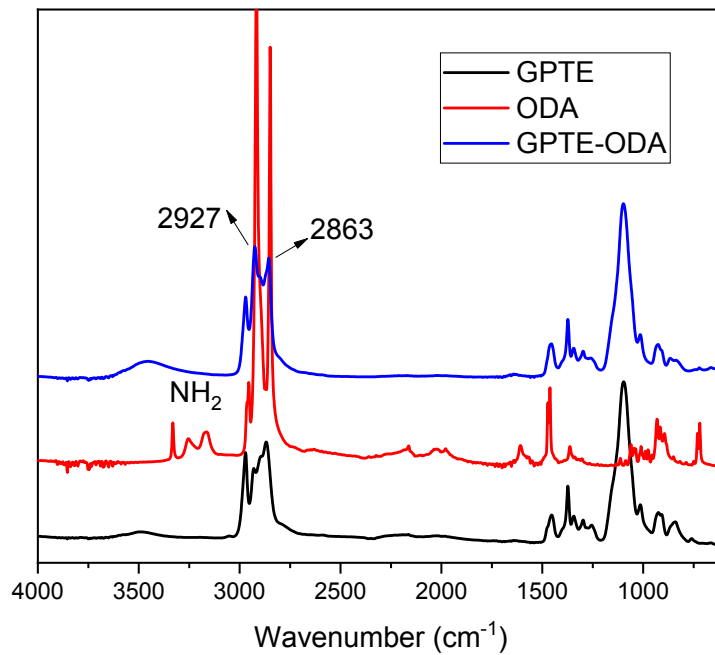

**Fig. S2** FTIR spectra of GPTE, ODA, and GPTE-ODA.

After grafting with ODA, new peaks at  $2927\text{ cm}^{-1}$  and  $2863\text{ cm}^{-1}$  occurred, which were assigned to the C–H stretching vibrations of methylene in alkyl group. In addition, the peaks of amino disappeared, which confirmed that one amino group reacted with two epoxy groups to form tertiary amine.

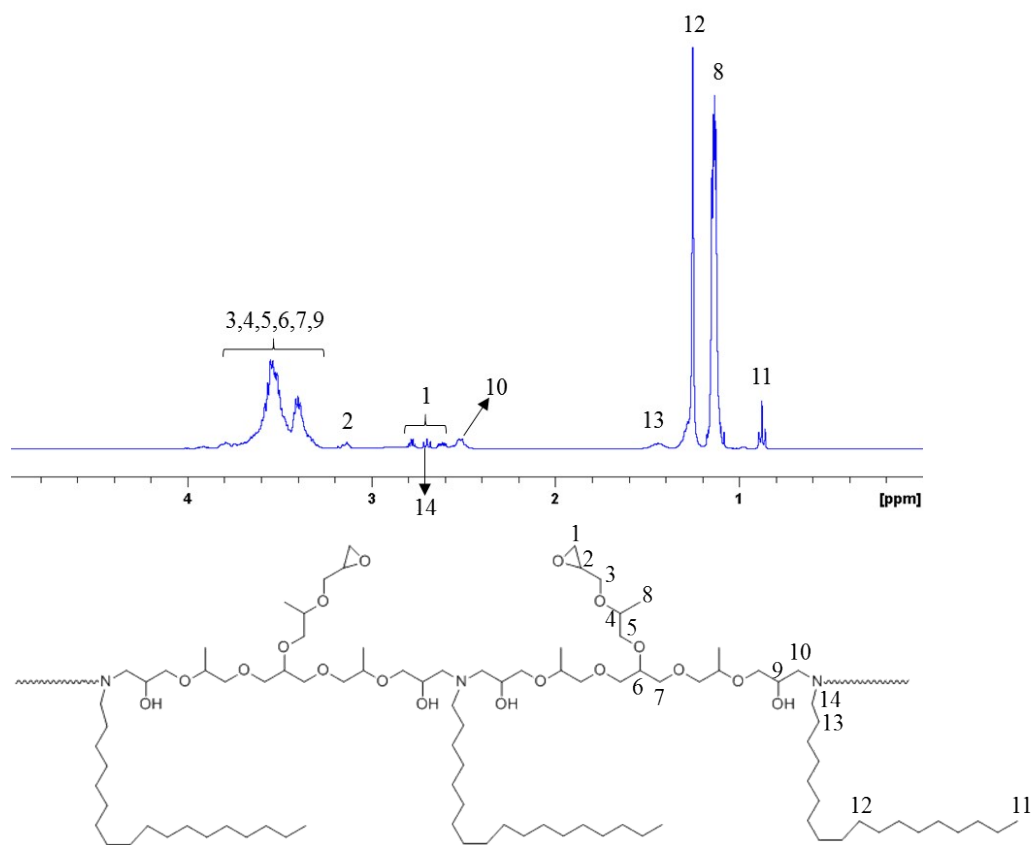

**Fig. S3**  $^1\text{H}$  NMR spectrum of GPTE-ODA compound.

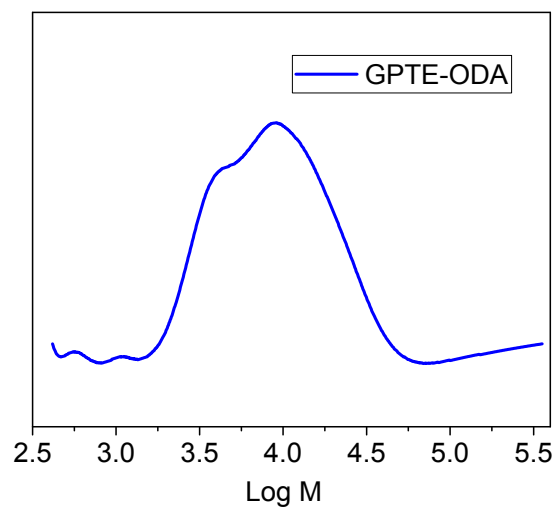

**Fig. S4** Differential molecular weight distribution curve for GPTE-ODA.

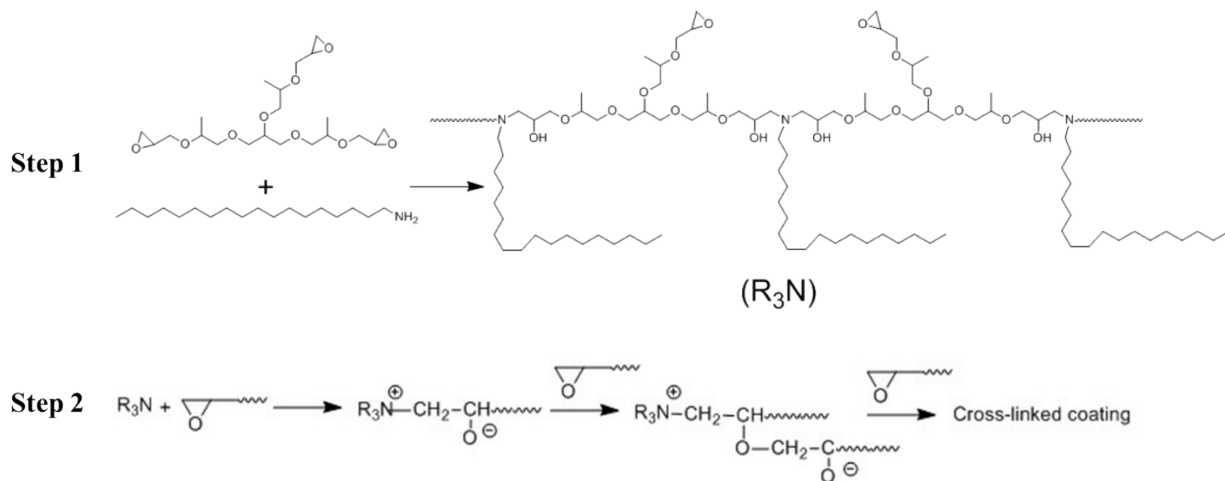

**Fig. S5** The reaction mechanism of crosslinking reaction.

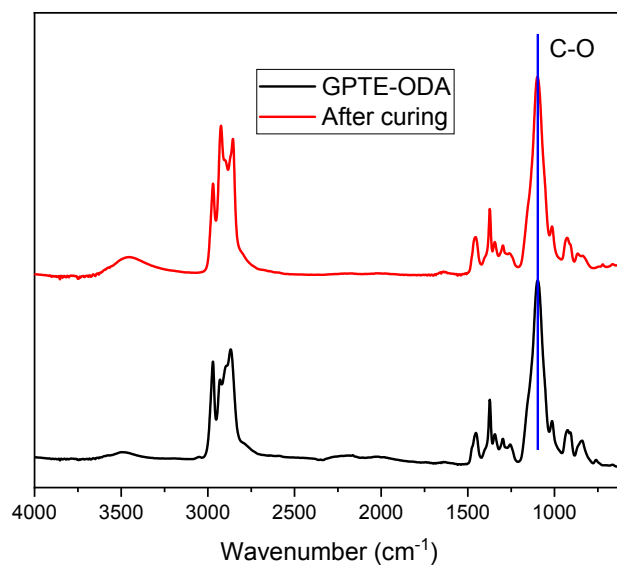

**Fig. S6** FTIR spectra of GPTE-ODA before and after curing.



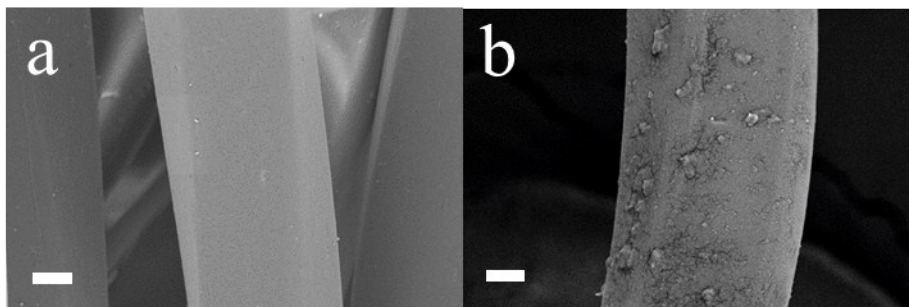

**Fig. S7** SEM images of polyester fibers a) before and b) after coating treatment (scale bar 5  $\mu\text{m}$ ).

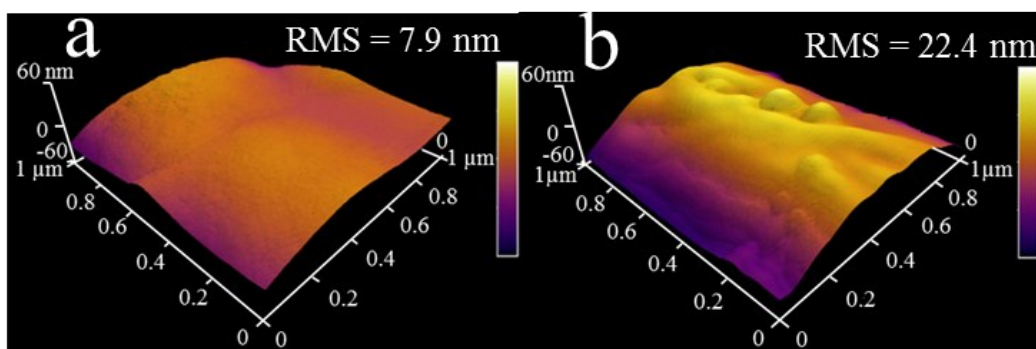

**Fig. S8** AFM images of polyester fibers a) before and b) after coating.

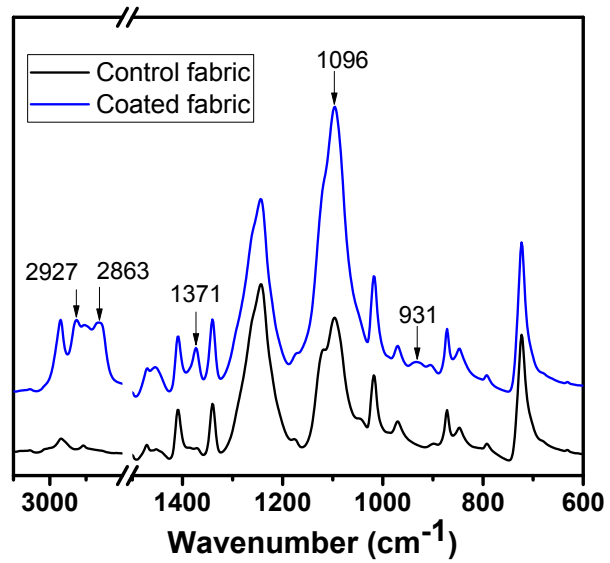

**Fig. S9** FTIR spectra of polyester fabric before and after coating.

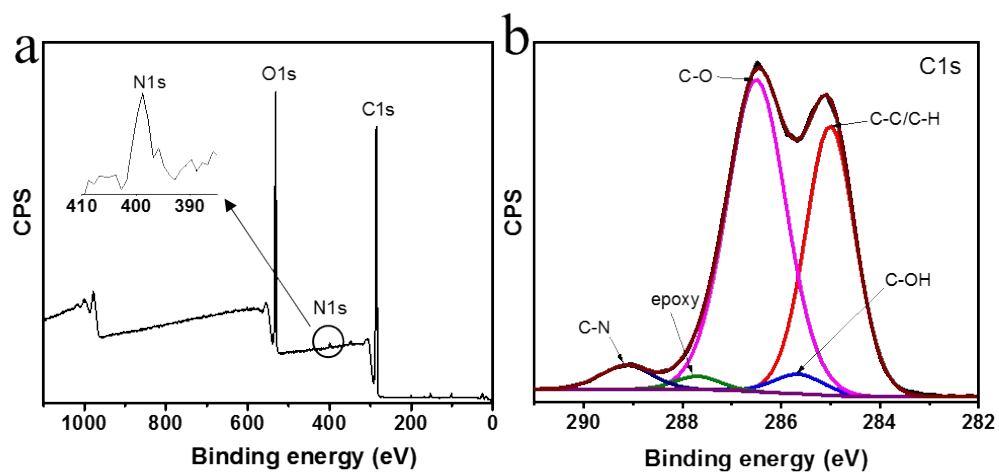

**Fig. S10** XPS a) survey and b) high-resolution C1s spectra of the coated polyester fabric.

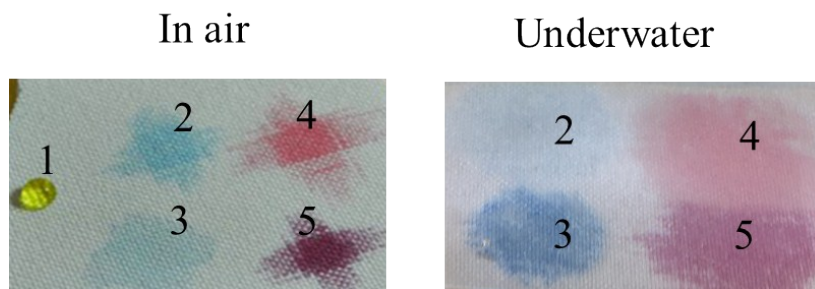

**Fig. S11** Photos of water (1), gasoline (2), dichloromethane (3), diesel (4), and diiodomethane (5) droplets (10  $\mu\text{L}$  each) on the uncoated polyester fabrics.

130°

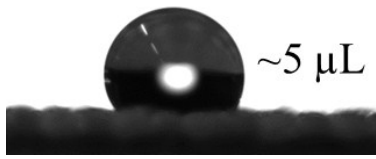

**Fig. S12** Water CA of uncoated polyester fabric.

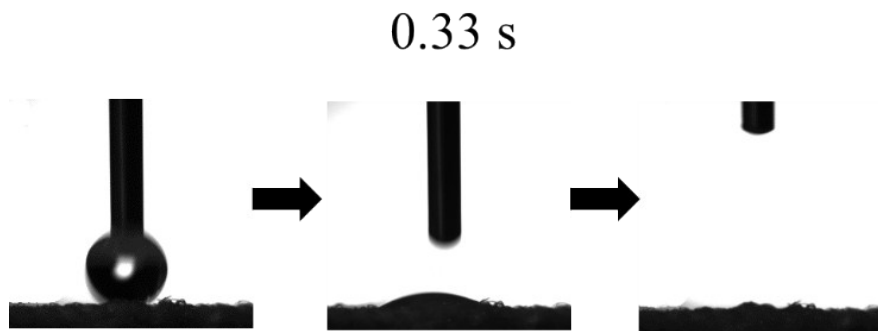

**Fig. S13** A water droplet ( $\sim 5 \mu\text{L}$ ) spread on the coated polyester fabric.

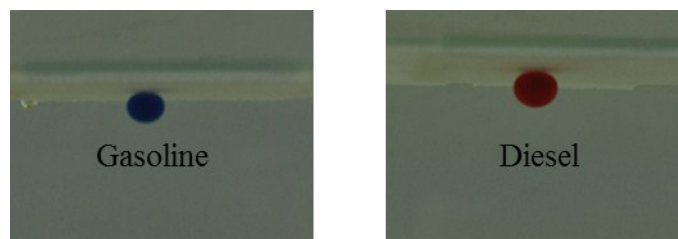

**Fig. S14** After vacuuming to remove the plastron layer, the uncoated polyester fabric showed a superoleophobic surface.



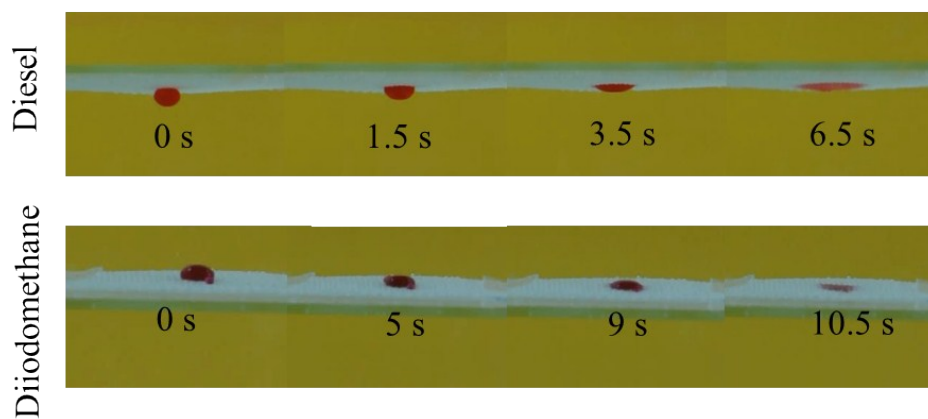

**Fig. S15** Still frames taken from videos to show the wetting of oil droplets ( $\sim 10 \mu\text{L}$ ) on the coated polyester fabric underwater

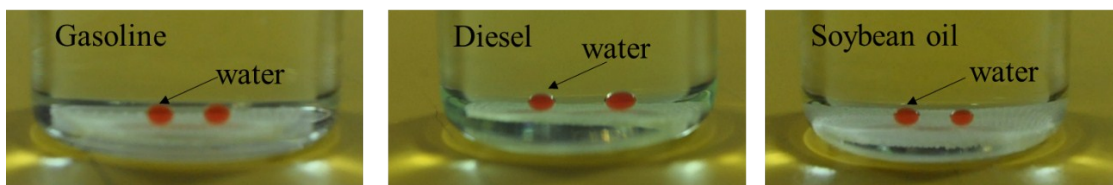

**Fig. S16** Dropping water on the coated polyester under gasoline, diesel and soybean oil.

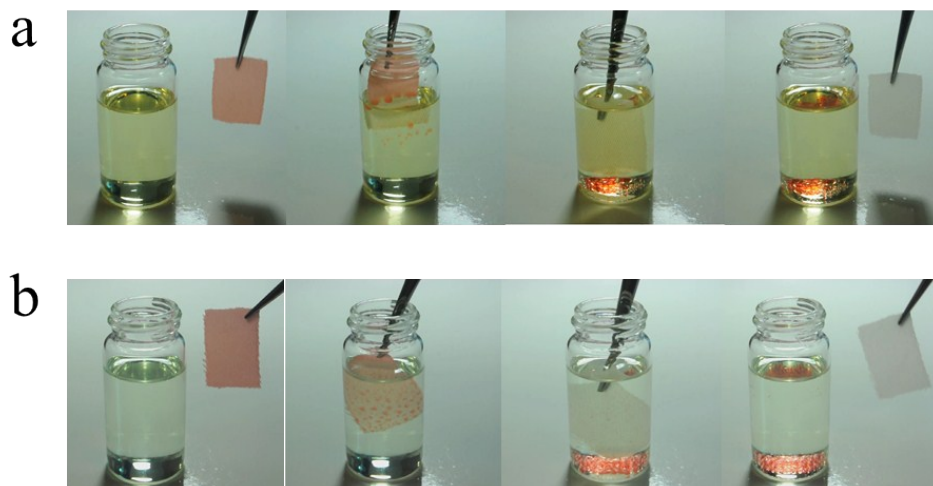

**Fig. S17** Immersing a piece of water pre-wetted polyester fabric (GPTE-ODA coated) in a) gasoline, b) diesel.

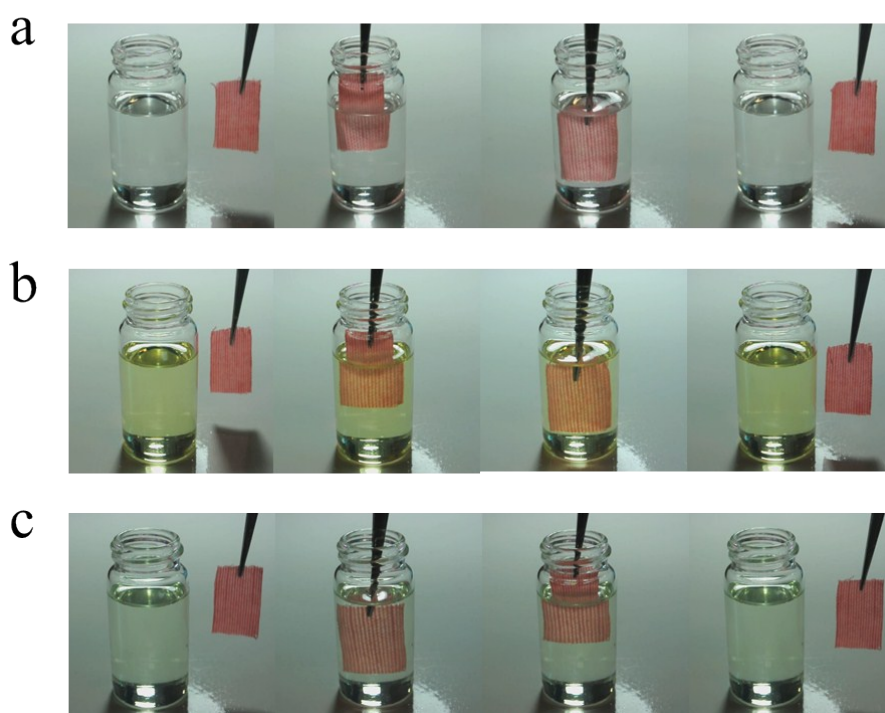

**Fig. S18** Immersing a piece of water soaked cotton fabric (uncoated) in a) dichloromethane, b) gasoline, c) diesel.

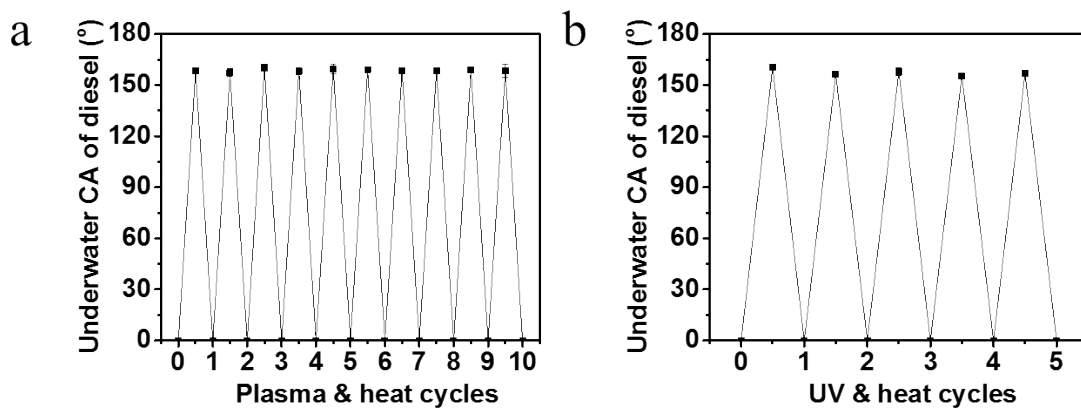

**Fig. S19** Underwater CA of diesel changes with a) plasma-and-heat treatment cycles, and b) UV-and-heat treatment cycles.

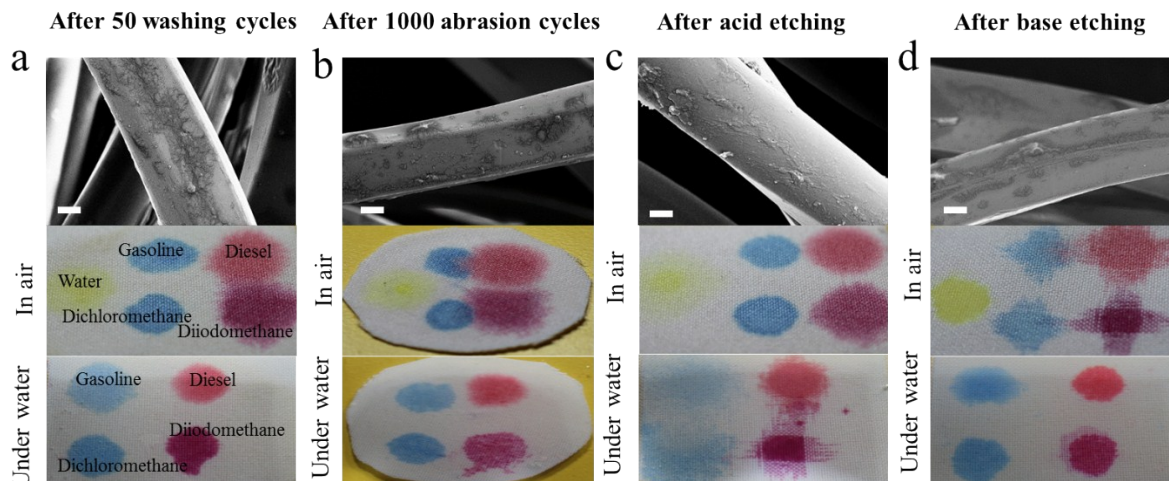

**Fig. S20** SEM (scale bar 5  $\mu\text{m}$ ) and photos of coated polyester fabric after harsh damages, a) after 50 cycles of washing, b) after 1000 cycles of abrasion test, and after immersing in c) HCl solution (pH=1) and d) NaOH solution (pH=14) for 24 hours followed by rinsing with water and drying at 80  $^{\circ}\text{C}$  for 30 min.

Washing and abrasion durability of the coated fabrics were evaluated according to AATCC 61-2006 and ASTM D4966 standards. Acid and base stability were examined by immersing the coated fabric in hydrochloric acid (pH = 1) or sodium hydroxide solution (pH = 14) at room temperature for 24 hours. After these harsh damages, SEM images showed that slight coating was removed from the surface after harsh damages. The coated polyester fabric still showed superamphiphilic property both in air and underwater states. Water was still able to spread on the fabric completely. The underwater spreading times of gasoline, dichloromethane, diesel, and diiodomethane were almost unchanged or slightly increased (Table S4).

*Durability test:* Washing durability of the coated fabrics was tested by reference of the washing procedure specified in the AATCC (American Association of Textile Chemists and Colorists) Test Method 61-2006 test No. 2A. The sample (5 cm \* 15 cm) and 50 steel balls were added to the washing solution. The test was performed using a standard laundering machine (MODEL H-240, NO. 4361, RAPID LABORTEX CO., LTD.). After running at  $40 \pm 2$  rpm for 45 min at 49  $^{\circ}\text{C}$ , the sample was rinsed three times with distilled water and dried at room temperature. This standard washing procedure was equivalent to five cycles of home laundry washing. For convenience, we used equivalent number of home laundering in this paper. Abrasion resistance test was evaluated using the Martindale method according to American Society for Testing and Materials (ASTM) D4966 test method, which was often used to evaluate the coated fabrics for heavy duty. The process was performed under a commercial Martindale abrasion tester (I.D.M Instrument Design & Maintenance). The test procedure should be in the standard atmosphere, which was  $21 \pm 1^{\circ}\text{C}$  and  $65 \pm 2\%$ , and the load on the fabrics was 9 kPa. Acid/base etching stability was examined by immersing the coated fabric in hydrochloric acid (pH = 1) or sodium hydroxide solution (pH = 14) at room temperature for 24 hours. The immersed fabric was rinsed with water and then dried at 80 $^{\circ}\text{C}$  for 30 min.

**Table S1** Element contents on the coated polyester surface

| Element | Element contents (Atomic %) |
|---------|-----------------------------|
| C1s     | 76.59                       |
| O1s     | 22.75                       |
| N1s     | 0.66                        |

**Table S2** Spreading time of coated polyester fabric for various liquids (~ 10  $\mu\text{L}$  each drop)

| Fluids             | Surface tension<br>(mN/m, 20 °C) | Viscosity<br>(mPa·s, 20 °C) | Spreading time<br>in air (s) | Spreading time<br>under water (s) |
|--------------------|----------------------------------|-----------------------------|------------------------------|-----------------------------------|
| Hexane             | 18.43                            | 0.33                        | 0.11 $\pm$ 0.02              | 1.10 $\pm$ 0.21                   |
| Heptane            | 20.14                            | 0.42                        | 0.08 $\pm$ 0.02              | 1.65 $\pm$ 0.17                   |
| Gasoline           | 21.56                            | 0.55                        | 0.11 $\pm$ 0.02              | 2.18 $\pm$ 0.50                   |
| Cyclohexane        | 24.95                            | 0.98                        | 0.18 $\pm$ 0.02              | 0.43 $\pm$ 0.09                   |
| Dodecane           | 25.35                            | 1.34                        | 0.11 $\pm$ 0.02              | 6.68 $\pm$ 1.85                   |
| Dichloromethane    | 26.50                            | 0.43                        | 0.09 $\pm$ 0.02              | 0.47 $\pm$ 0.07                   |
| Tetradecane        | 26.56                            | 2.81                        | 0.23 $\pm$ 0.06              | 8.94 $\pm$ 4.12                   |
| Pentadecane        | 26.90                            | 3.73                        | 0.28 $\pm$ 0.02              | 8.61 $\pm$ 2.56                   |
| Hexadecane         | 27.47                            | 3.04                        | 0.25 $\pm$ 0.02              | 12.04 $\pm$ 3.64                  |
| Chloroform         | 27.50                            | 0.56                        | 0.07 $\pm$ 0.00              | 0.48 $\pm$ 0.05                   |
| Diesel             | 28.30                            | 3.16                        | 0.23 $\pm$ 0.03              | 5.90 $\pm$ 0.71                   |
| Soybean oil        | 31.50                            | 80.00                       | 5.27 $\pm$ 0.70              | 47.54 $\pm$ 6.80                  |
| Olive oil          | 32.00                            | 81.00                       | 5.40 $\pm$ 1.41              | 36.02 $\pm$ 4.65                  |
| 1,2-Dichloroethane | 32.20                            | 0.84                        | 0.08 $\pm$ 0.02              | 0.50 $\pm$ 0.09                   |
| Terpineol          | 33.20                            | 40.00                       | 5.23 $\pm$ 0.24              | 4.81 $\pm$ 0.21                   |
| Diiodomethane      | 50.80                            | 2.76                        | 0.12 $\pm$ 0.02              | 12.84 $\pm$ 5.03                  |
| Water              | 72.80                            | 1.00                        | 0.45 $\pm$ 0.13              | /                                 |



**Table S3** Effect of coating formula on wettability

| Fluids           |                    | Wettable (Yes or No) |     |     |      |      |           |
|------------------|--------------------|----------------------|-----|-----|------|------|-----------|
| GPTE:ODA*        |                    | 1:1                  | 3:1 | 5:1 | 15:1 | 20:1 | Only GPTE |
| Dry state in air | Water              | NO (CA140°)          | YES | YES | YES  | YES  | YES       |
| Under water      | Hexane             | /                    | YES | YES | NO   | NO   | NO        |
|                  | Heptane            | /                    | YES | YES | NO   | NO   | NO        |
|                  | Gasoline           | /                    | YES | YES | YES  | YES  | NO        |
|                  | Cyclohexane        | /                    | YES | YES | YES  | YES  | YES       |
|                  | Dodecane           | /                    | YES | YES | NO   | NO   | NO        |
|                  | Dichloromethane    | /                    | YES | YES | YES  | YES  | YES       |
|                  | Tetradecane        | /                    | YES | YES | NO   | NO   | NO        |
|                  | Pentadecane        | /                    | YES | YES | NO   | NO   | NO        |
|                  | Hexadecane         | /                    | YES | YES | NO   | NO   | NO        |
|                  | Chloroform         | /                    | YES | YES | YES  | YES  | YES       |
|                  | Diesel             | /                    | YES | YES | YES  | YES  | NO        |
|                  | Soybean oil        | /                    | YES | YES | NO   | NO   | NO        |
|                  | Olive oil          | /                    | YES | YES | NO   | NO   | NO        |
|                  | 1,2-Dichloroethane | /                    | YES | YES | YES  | YES  | YES       |
| Terpineol        | /                  | YES                  | YES | YES | YES  | YES  |           |
| Diiodomethane    | /                  | YES                  | YES | YES | YES  | NO   |           |

| Fluids           |                 | Spreading time (s) |       |
|------------------|-----------------|--------------------|-------|
| GPTE:ODA*        |                 | 3:1                | 5:1   |
| Dry state in air | Water           | 1.01               | 0.45  |
| Under water      | Gasoline        | 3.01               | 2.18  |
|                  | Dichloromethane | 0.50               | 0.47  |
|                  | Diesel          | 6.89               | 6.21  |
|                  | Diiodomethane   | 16.68              | 12.84 |

\* GPTE in coating solution 10 wt%

**Table S4** Wettability of coated polyester fabric after harsh damages

| Fluids<br>(~ 10 $\mu$ L)         | Spreading time (s)           |                                 |                                     |                                     |
|----------------------------------|------------------------------|---------------------------------|-------------------------------------|-------------------------------------|
|                                  | After washing<br>(50 cycles) | After abrasion<br>(1000 cycles) | After acid<br>etching (24<br>hours) | After base<br>etching (24<br>hours) |
| Water (in air)                   | $5.62 \pm 0.38$              | $1.42 \pm 0.14$                 | $0.42 \pm 0.10$                     | $0.52 \pm 0.07$                     |
| Gasoline<br>(under water)        | $2.26 \pm 0.34$              | $2.13 \pm 1.08$                 | $2.38 \pm 1.04$                     | $2.15 \pm 0.67$                     |
| Dichloromethane<br>(under water) | $0.63 \pm 0.03$              | $0.47 \pm 0.02$                 | $0.53 \pm 0.09$                     | $0.51 \pm 0.12$                     |
| Diesel<br>(under water)          | $9.53 \pm 1.86$              | $6.85 \pm 2.19$                 | $5.74 \pm 1.54$                     | $5.26 \pm 1.95$                     |
| Diiodomethane<br>(under water)   | $30.96 \pm 5.54$             | $29.61 \pm 3.35$                | $15.15 \pm 2.82$                    | $16.47 \pm 4.01$                    |

Video S1: Dropping a water droplet ( $\sim 5 \mu\text{L}$ ) on the coated fabric.

Video S2: Oil droplets on the coated fabric in water.

Video S3: Dichloromethane droplet spreading on a water pre-wetted PET film (GPTE-ODA coated).

Video S4: Immersing water pre-wetted polyester fabric (GPTE-ODA coated) into dichloromethane.

Video S5: Immersing water pre-wetted polyester fabric (GPTE-ODA coated) into gasoline.
